# Supplementary material for: Optimization of Pavlova gyrans biomass production and the fatty acid profile using a two-step approach
Source: Royal Society of Chemistry journal article supplement (doi:10.1039/d3fb00110e), 2023-01-01
Supplement: d3fb00110e1.pdf [file d3fb00110e1.pdf]

## **Optimization of *Pavlova gyrans* biomass production and fatty acids profile using a two-step approach**

Filipe Maciel<sup>1</sup>, Daniela Couto<sup>3,4</sup>, Pedro Geada<sup>1,2\*</sup>, Hugo Pereira<sup>5</sup>, José Teixeira<sup>1,2</sup>, M. Rosário Domingues<sup>3,4</sup>, Joana Silva<sup>6</sup>, António Vicente<sup>1,2</sup>

<sup>1</sup>CEB - Centre of Biological Engineering, University of Minho, Campus de Gualtar, Braga, Portugal

<sup>2</sup>LABELS - Associate Laboratory, Guimarães, Braga, Portugal

<sup>3</sup>Mass Spectrometry Centre, LAQV-REQUIMTE, Department of Chemistry, University of Aveiro, Santiago University Campus, 3810-193 Aveiro, Portugal

<sup>4</sup>CESAM - Centre for Environmental and Marine Studies, Department of Chemistry, University of Aveiro, Santiago University Campus, Aveiro, Portugal

<sup>5</sup>GreenCoLab - Associação Oceano Verde, Universidade do Algarve, Campus de Gambelas, 8005-139 Faro, Portugal

<sup>6</sup>ALLMICROALGAE, Natural Products S.A., R&D Department, Rua 25 de Abril 19, 2445-287 Pataias, Portugal

\*Corresponding author: Pedro Geada – pedrogeada@ceb.uminho.pt

## Supplementary information

ESI Table S1: the twenty-seven experiments combination of the RCCD with the real and coded values (within parentheses) of the independent variables: light intensity

( $\mu\text{mol.photons.m}^{-2}.\text{s}^{-1}$ ),  $\text{NaNO}_3$  ( $\text{mg.L}^{-1}$ ),  $\text{NaH}_2\text{PO}_4.\text{H}_2\text{O}$  ( $\text{mg.L}^{-1}$ ) and  $\text{CuSO}_4.5\text{H}_2\text{O}$  ( $\mu\text{g.L}^{-1}$ )

| #E | Light intensity ( $x_3$ ) | $\text{NaNO}_3$ ( $x_5$ ) | $\text{NaH}_2\text{PO}_4.\text{H}_2\text{O}$ ( $x_6$ ) | $\text{CuSO}_4.5\text{H}_2\text{O}$ ( $x_{15}$ ) |
|----|---------------------------|---------------------------|--------------------------------------------------------|--------------------------------------------------|
| 1  | 350 (-1)                  | 750 (-1)                  | 20 (-1)                                                | 5 (-1)                                           |
| 2  | 650 (1)                   | 750 (-1)                  | 20 (-1)                                                | 5 (-1)                                           |
| 3  | 350 (-1)                  | 1250 (1)                  | 20 (-1)                                                | 5 (-1)                                           |
| 4  | 650 (1)                   | 1250 (1)                  | 20 (-1)                                                | 5 (-1)                                           |
| 5  | 350 (-1)                  | 750 (-1)                  | 40 (1)                                                 | 5 (-1)                                           |
| 6  | 650 (1)                   | 750 (-1)                  | 40 (1)                                                 | 5 (-1)                                           |
| 7  | 350 (-1)                  | 1250 (1)                  | 40 (1)                                                 | 5 (-1)                                           |
| 8  | 650 (1)                   | 1250 (1)                  | 40 (1)                                                 | 5 (-1)                                           |
| 9  | 350 (-1)                  | 750 (-1)                  | 20 (-1)                                                | 15 (1)                                           |
| 10 | 650 (1)                   | 750 (-1)                  | 20 (-1)                                                | 15 (1)                                           |
| 11 | 350 (-1)                  | 1250 (1)                  | 20 (-1)                                                | 15 (1)                                           |
| 12 | 650 (1)                   | 1250 (1)                  | 20 (-1)                                                | 15 (1)                                           |
| 13 | 350 (-1)                  | 750 (-1)                  | 40 (1)                                                 | 15 (1)                                           |
| 14 | 650 (1)                   | 750 (-1)                  | 40 (1)                                                 | 15 (1)                                           |
| 15 | 350 (-1)                  | 1250 (1)                  | 40 (1)                                                 | 15 (1)                                           |
| 16 | 650 (1)                   | 1250 (1)                  | 40 (1)                                                 | 15 (1)                                           |
| 17 | 200 (-2)                  | 1000 (0)                  | 30 (0)                                                 | 10 (0)                                           |
| 18 | 800 (2)                   | 1000 (0)                  | 30 (0)                                                 | 10 (0)                                           |
| 19 | 500 (0)                   | 500 (-2)                  | 30 (0)                                                 | 10 (0)                                           |
| 20 | 500 (0)                   | 1500 (2)                  | 30 (0)                                                 | 10 (0)                                           |
| 21 | 500 (0)                   | 1000 (0)                  | 10 (-2)                                                | 10 (0)                                           |
| 22 | 500 (0)                   | 1000 (0)                  | 50 (2)                                                 | 10 (0)                                           |
| 23 | 500 (0)                   | 1000 (0)                  | 30 (0)                                                 | 0 (-2)                                           |
| 24 | 500 (0)                   | 1000 (0)                  | 30 (0)                                                 | 20 (2)                                           |
| 25 | 500 (0)                   | 1000 (0)                  | 30 (0)                                                 | 10 (0)                                           |
| 26 | 500 (0)                   | 1000 (0)                  | 30 (0)                                                 | 10 (0)                                           |
| 27 | 500 (0)                   | 1000 (0)                  | 30 (0)                                                 | 10 (0)                                           |

ESI Table S2: combination of growth conditions used in the validation experiments: optimized conditions, Opt, control/Walne's medium, Con, medium without vitamins, Vit-, and assay with the non-significant variables of the PB design defined at Level -1, Lvl-1

| Variable                                                                                                    | Opt      | Lvl-1      | Vit-     | Con      |
|-------------------------------------------------------------------------------------------------------------|----------|------------|----------|----------|
| Light intensity ( $\mu\text{mol.photons.m}^{-2}.\text{s}^{-1}$ )                                            | 700      | 700        | 700      | 700      |
| NaNO <sub>3</sub> (mg.L <sup>-1</sup> )                                                                     | 1500     | 1500       | 1500     | 100      |
| CuSO <sub>4</sub> .5H <sub>2</sub> O ( $\mu\text{g.L}^{-1}$ )                                               | 6        | 6          | 6        | 20 (0)   |
| NaH <sub>2</sub> PO <sub>4</sub> .H <sub>2</sub> O (mg.L <sup>-1</sup> )                                    | 40       | 40         | 40       | 20 (0)   |
| Na <sub>2</sub> H <sub>2</sub> EDTA.2H <sub>2</sub> O (mg.L <sup>-1</sup> )                                 | 45 (0)   | 22.5 (-1)  | 45 (0)   | 45 (0)   |
| H <sub>3</sub> BO <sub>3</sub> (mg.L <sup>-1</sup> )                                                        | 33.6 (0) | 16.8 (-1)  | 33.6 (0) | 33.6 (0) |
| FeCl <sub>3</sub> .6H <sub>2</sub> O (mg.L <sup>-1</sup> )                                                  | 1.3 (0)  | 0.65 (-1)  | 1.3 (0)  | 1.3 (0)  |
| MnCl <sub>2</sub> .4H <sub>2</sub> O ( $\mu\text{g.L}^{-1}$ )                                               | 360 (0)  | 180 (-1)   | 360 (0)  | 360 (0)  |
| ZnCl <sub>2</sub> ( $\mu\text{g.L}^{-1}$ )                                                                  | 21 (0)   | 10.25 (-1) | 21 (0)   | 21 (0)   |
| CoCl <sub>2</sub> .6H <sub>2</sub> O ( $\mu\text{g.L}^{-1}$ )                                               | 20 (0)   | 10 (-1)    | 20 (0)   | 20 (0)   |
| (NH <sub>4</sub> ) <sub>6</sub> Mo <sub>7</sub> O <sub>24</sub> .4H <sub>2</sub> O ( $\mu\text{g.L}^{-1}$ ) | 9 (0)    | 4.5 (-1)   | 9 (0)    | 9 (0)    |
| Thiamine ( $\mu\text{g.L}^{-1}$ )                                                                           | 100 (0)  | 50 (-1)    | -        | 100 (0)  |
| Cyanocobalamin ( $\mu\text{g.L}^{-1}$ )                                                                     | 5 (0)    | 2.5 (-1)   | -        | 5 (0)    |
| NaHCO <sub>3</sub> (mg.L <sup>-1</sup> )                                                                    | 170 (-1) | 170 (-1)   | 170 (-1) | -        |
| Salinity (psu)                                                                                              | 30 (0)   | 20 (-1)    | 30 (0)   | 30 (0)   |
| Air flow (mL.min <sup>-1</sup> )                                                                            | 600 (-1) | 600 (-1)   | 600 (-1) | 600 (-1) |
| Inoculum size (g AFDW.L <sup>-1</sup> )                                                                     | 0.1 (-1) | 0.1 (-1)   | 0.1 (-1) | 0.1 (-1) |

ESI Table S3: values of maximum biomass produced ( $X_{max}$ , g AFDW.L<sup>-1</sup>) and volumetric biomass productivity ( $P_x$ , g AFDW.L<sup>-1</sup>.d<sup>-1</sup>) at the beginning of the stationary phase ( $t_x$ , days) for the *P. gyrans* grown in the validation assays: optimized conditions, Opt, control/Walne's medium, Con, medium without vitamins, Vit-, and assay with the variables considered non-significant in PB design fixed at Level -1, Lvl-1. Values are the mean and standard deviation of three replicates ( $n=3$ ). Different letters indicate significant differences between the validation assays (one-way ANOVA,  $p < 0.05$ , followed by the Tukey's test). Gain was calculated as the ratio of  $X_{max}/X_{max.control}$

|       | $t_x$ (d) | $P_x$                      | $X_{max}$                | Gain |
|-------|-----------|----------------------------|--------------------------|------|
| Con   | 4         | 0.148 ± 0.003 <sup>A</sup> | 0.59 ± 0.01 <sup>a</sup> | 1.0  |
| Lvl-1 | 4         | 0.229 ± 0.013 <sup>B</sup> | 0.92 ± 0.05 <sup>b</sup> | 1.5  |
| Vit-  | 4         | 0.153 ± 0.001 <sup>A</sup> | 0.61 ± 0.01 <sup>a</sup> | 1.0  |
| Opt   | 10        | 0.225 ± 0.005 <sup>B</sup> | 2.26 ± 0.05 <sup>c</sup> | 3.8  |

ESI Table S4: experimental and predicted values, as well as the relative errors ( $\%RE = 100 \times (Exp - Pred) / Exp$ ), for the responses maximum biomass produced ( $X_{max}$ , g AFDW.L<sup>-1</sup>), protein content (% w.w<sup>-1</sup>), total lipids (% w.w<sup>-1</sup>), eicosapentaenoic acid (EPA, % TFA) and docosahexaenoic acid (DHA, % TFA), achieved under the optimal conditions defined for validation of the mathematical models produced

| Response        | Experimental | Predicted | %RE   |
|-----------------|--------------|-----------|-------|
| $X_{max}$       | 2.26 ± 0.05  | 2.34      | -3.69 |
| Protein content | 30.76 ± 4.37 | 30.58     | 0.60  |
| Total lipids    | 28.30 ± 0.95 | 22.05     | 22.10 |
| EPA             | 20.69 ± 1.61 | 7.37      | 64.39 |
| DHA             | 10.33 ± 0.30 | 1.80      | 82.54 |

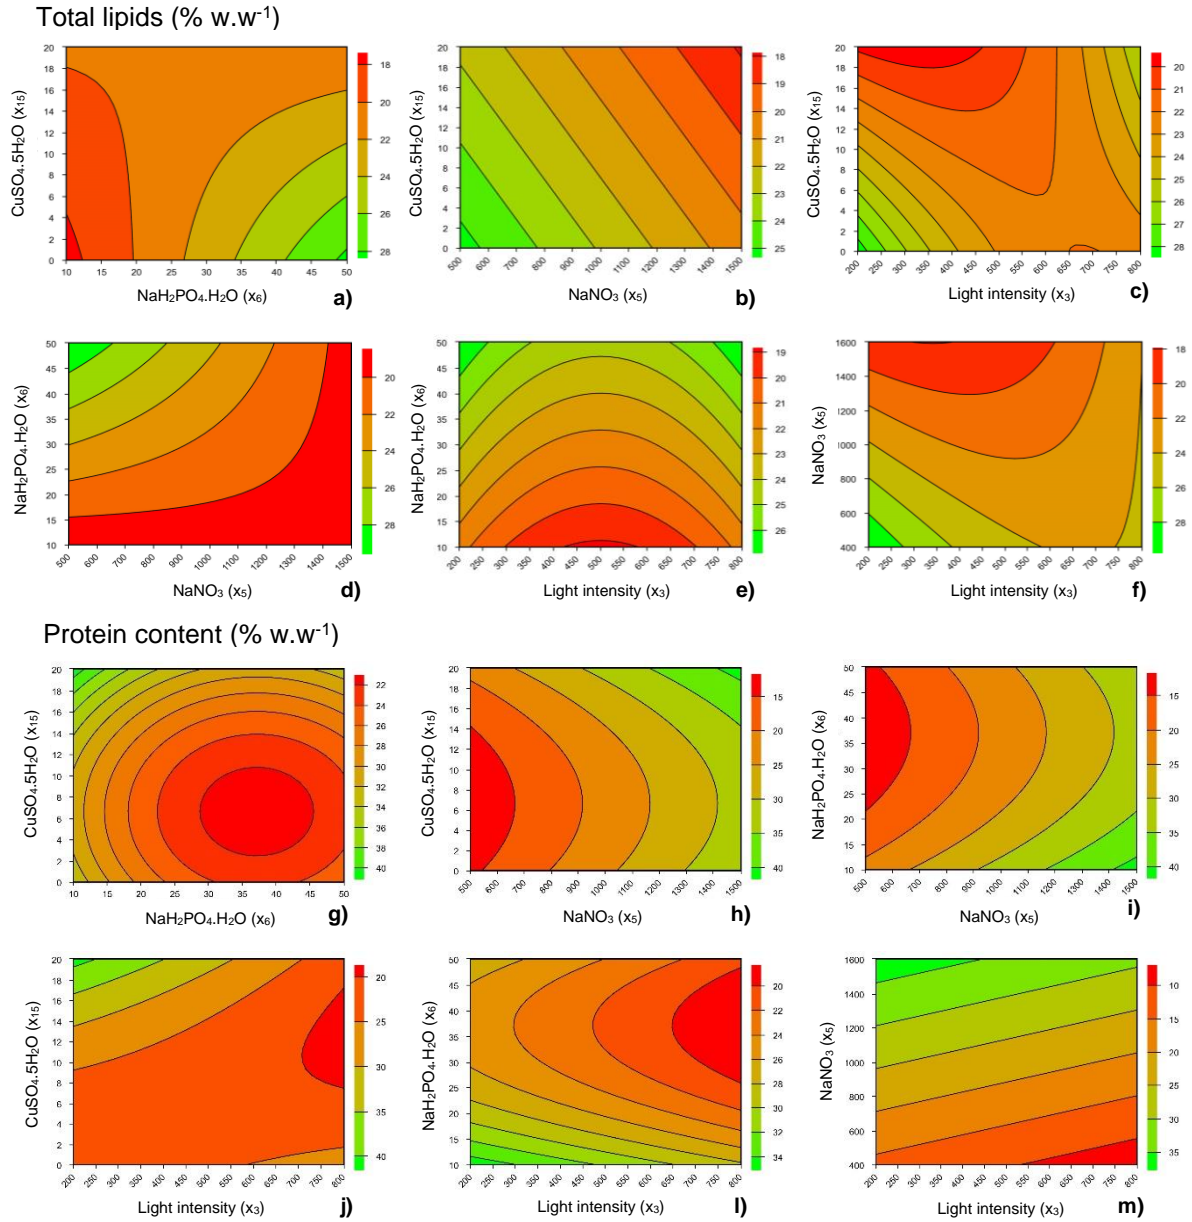

ESI Figure S1: Contour curves from RCCD for the dependent variable total lipids (% w.w<sup>-1</sup>), a-f), illustrating the interactions between CuSO<sub>4</sub>.5H<sub>2</sub>O and NaH<sub>2</sub>PO<sub>4</sub>.H<sub>2</sub>O, (a), CuSO<sub>4</sub>.5H<sub>2</sub>O and NaNO<sub>3</sub>, (b), CuSO<sub>4</sub>.5H<sub>2</sub>O and light intensity, (c), NaH<sub>2</sub>PO<sub>4</sub>.H<sub>2</sub>O and NaNO<sub>3</sub>, (d), NaH<sub>2</sub>PO<sub>4</sub>.H<sub>2</sub>O and light intensity, (e), and NaNO<sub>3</sub> and light intensity, (f). Contour curves for protein content (% w.w<sup>-1</sup>), g-m), illustrating the interactions between CuSO<sub>4</sub>.5H<sub>2</sub>O and NaH<sub>2</sub>PO<sub>4</sub>.H<sub>2</sub>O, (g), CuSO<sub>4</sub>.5H<sub>2</sub>O and NaNO<sub>3</sub>, (h), NaH<sub>2</sub>PO<sub>4</sub>.H<sub>2</sub>O and NaNO<sub>3</sub>, (i), CuSO<sub>4</sub>.5H<sub>2</sub>O and light intensity, (j), NaH<sub>2</sub>PO<sub>4</sub>.H<sub>2</sub>O and light intensity, l), NaNO<sub>3</sub> and light intensity, m)

### EPA %TFA

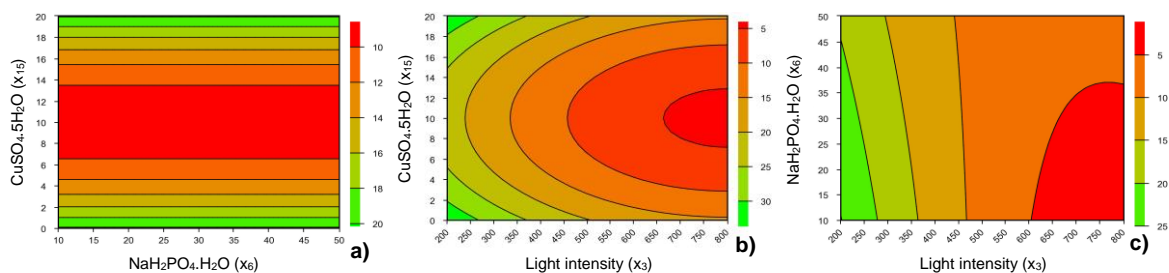

### DHA %TFA

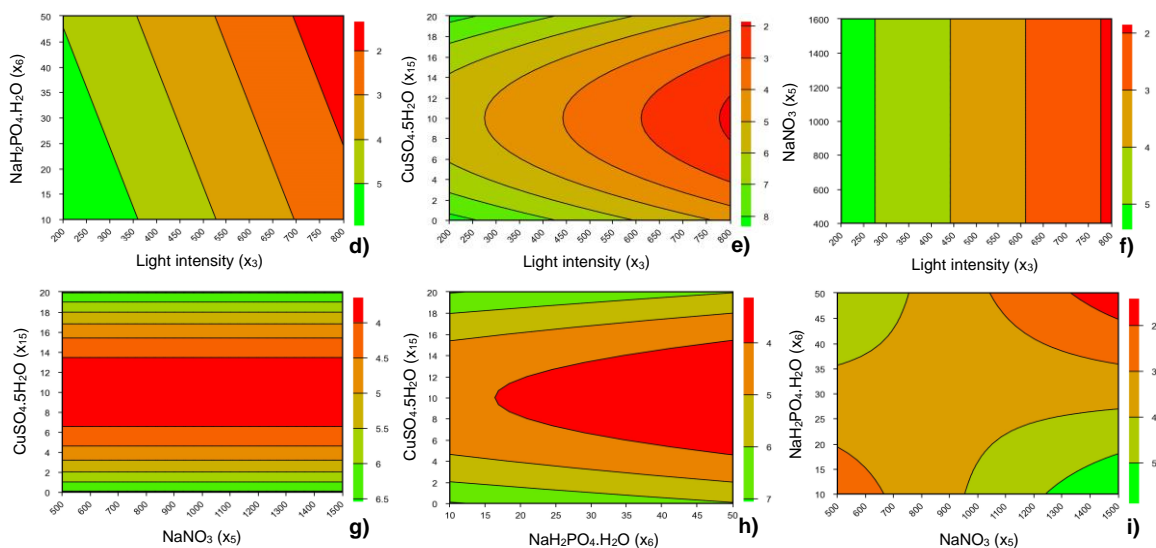

ESI Figure S2: Contour curves from RCCD for the dependent variable EPA %TFA, a-c), illustrating the interactions between  $\text{CuSO}_4 \cdot 5\text{H}_2\text{O}$  and  $\text{NaH}_2\text{PO}_4 \cdot \text{H}_2\text{O}$ , a),  $\text{CuSO}_4 \cdot 5\text{H}_2\text{O}$  and light intensity, b), and  $\text{NaH}_2\text{PO}_4 \cdot \text{H}_2\text{O}$  and light intensity, c). Contour curves for DHA %TFA, d-i), illustrating the interactions between  $\text{NaH}_2\text{PO}_4 \cdot \text{H}_2\text{O}$  and light intensity, d),  $\text{CuSO}_4 \cdot 5\text{H}_2\text{O}$  and light intensity, e),  $\text{NaNO}_3$  and light intensity, f),  $\text{CuSO}_4 \cdot 5\text{H}_2\text{O}$  and  $\text{NaNO}_3$ , (h),  $\text{CuSO}_4 \cdot 5\text{H}_2\text{O}$  and  $\text{NaH}_2\text{PO}_4 \cdot \text{H}_2\text{O}$ , h), and  $\text{NaH}_2\text{PO}_4 \cdot \text{H}_2\text{O}$  and  $\text{NaNO}_3$ , i)
